# Supplementary material for: The suitability of Ce3+-modified ZnO photocatalyst for the mineralization of monochlorophenol isomers in sunlight exposure
Source: Royal Society of Chemistry journal article supplement (doi:10.1039/c4ra07038k), 2014-01-01
Supplement: c4ra07038k1.pdf [file c4ra07038k1.pdf]

## Supplementary Information

### ❖ Details of equipment

The morphology of the synthesized photocatalyst was examined by Field Emission Scanning Electron Microscope (FESEM, JEOL JSM 6490-A). *HORIBA Scientific* (Jobin Yvon *Fluoro Log 3*), France, *macro PL system* was used to record the photoluminescence spectra of bare and  $\text{Ce}^{3+}$  modified ZnO powders at 325 nm excitation wavelength. The emissions were recorded from 350-650 nm. The powder XRD patterns of synthesized photocatalysts were recorded by Xpert x-ray powder diffractometer (Philips PW1398) with Cu  $K\alpha$  radiation source from  $20^\circ$  to  $80^\circ$  ( $2\theta$ ) with a step time of 3 seconds and step size of  $0.05^\circ$ . Scherer's equation was applied on main reflections to evaluate the crystallite size of various phases. High performance liquid chromatograph (HPLC) (SPD-20A, Shimadzu Corporation, Japan). A 60:40 Methanol-Water mixture as solvent, c18 column and 254 nm detector wavelength was selected for analysis. Thermo scientific, USA, ion chromatograph, Dionex (ICS-5000 + EG Eluent Generator), was used to measure the released ions during photocatalytic process. TOC-VCPH total carbon analyzer supplied by Shimadzu Corporation, Japan, measured total Organic Carbon (TOC) of the samples. Selected samples were analyzed by GC-MS (Shimadzu Corporation, Japan, Shimadzu-QP2010 Plus) equipped with RtX1 capillary column, for the identification of unknown compounds formed as intermediate during the mineralization process using Helium (He) as carrier gas.

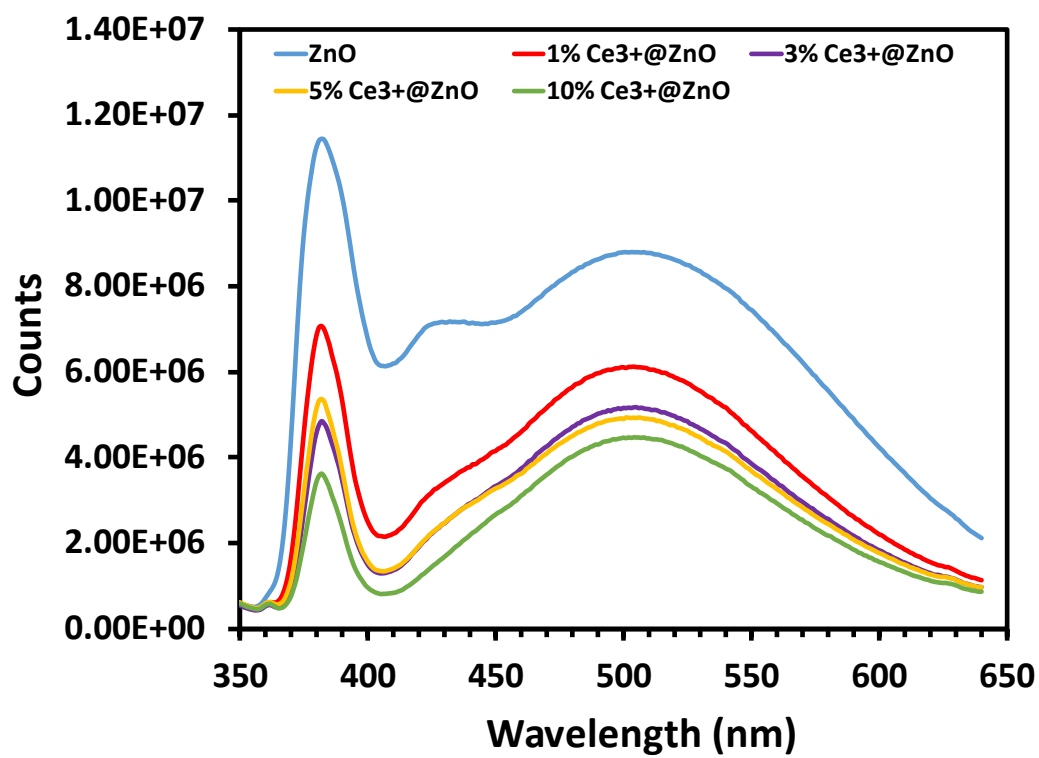

**Fig. S1.** The comparison of the PL spectra of pure and synthesized Ce<sup>3+</sup> impregnated ZnO.

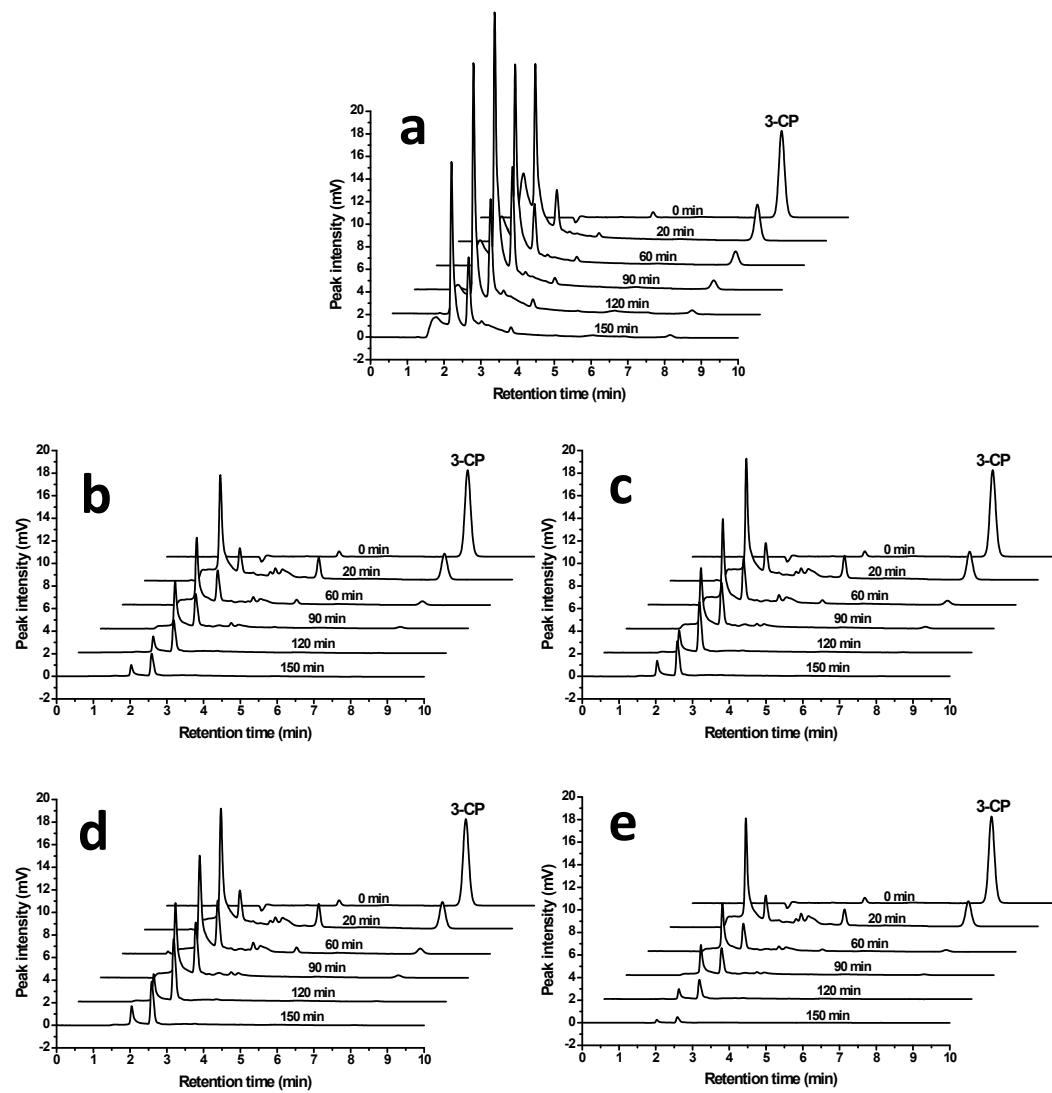

**Fig. S2.** The comparison of the HPLC profiles for the degradation of 3-CP (a) pure ZnO (b) 1%Ce<sup>3+</sup>@ZnO (c) 3%Ce<sup>3+</sup>@ZnO (d) 5%Ce<sup>3+</sup>@ZnO and (e) 10%Ce<sup>3+</sup>@ZnO.

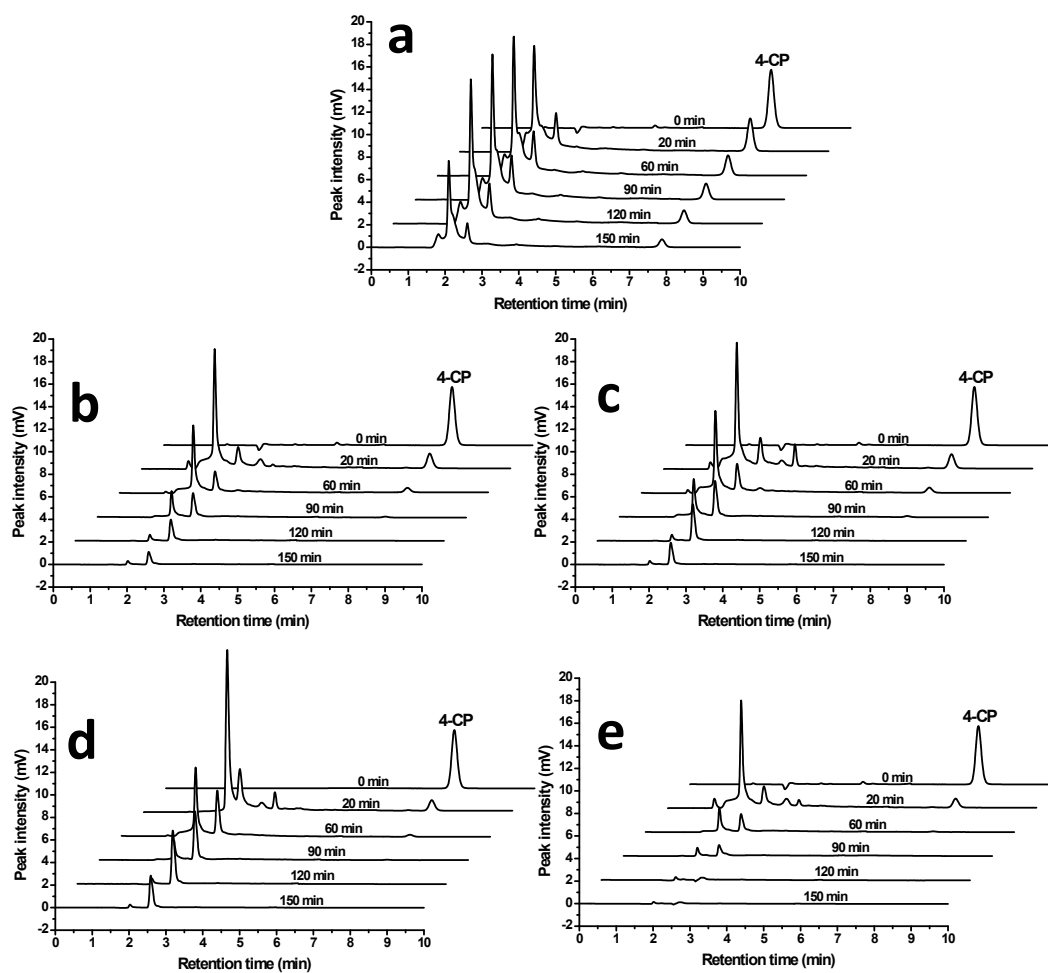

**Fig. S3.** The comparison of the HPLC profiles for the degradation of 4-CP (a) pure ZnO (b) 1%Ce<sup>3+</sup>@ZnO (c) 3%Ce<sup>3+</sup>@ZnO (d) 5%Ce<sup>3+</sup>@ZnO and (e) 10%Ce<sup>3+</sup>@ZnO

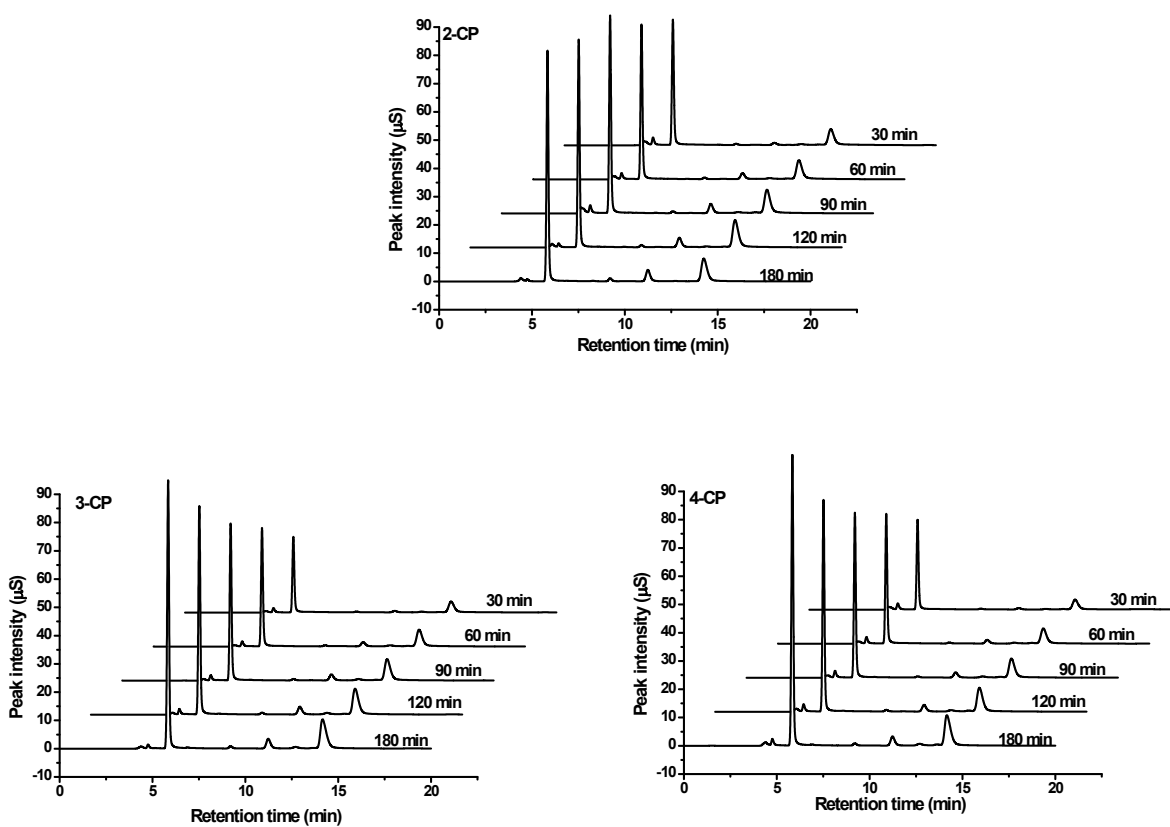

**Fig. S4.** The comparison of IC profiles for the release of anions in the solution for the degradation of 2-CP, 3-CP and 4-CP (50 ppm) over 1%Ce<sup>3+</sup>@ZnO in sunlight exposure.
